# Supplementary material for: Home-based versus centre-based cardiac rehabilitation: abridged Cochrane systematic review and meta-analysis
Source: PubMed Central journal article supplement — Open Heart. 2016 Sep 14;3(2):e000463. doi: 10.1136/openhrt-2016-000463 (PMC5030549; doi:10.1136/openhrt-2016-000463), 2016-09-14
Supplement: openhrt-2016-000463supp.pdf [file openhrt-2016-000463supp.pdf]

## Supplementary Files

### Supplementary Tables

#### Supplementary Table A: Characteristics of excluded studies (at point of full text review)

| Reason for exclusion                             | Citation                                                                                                                                                                                           |
|--------------------------------------------------|----------------------------------------------------------------------------------------------------------------------------------------------------------------------------------------------------|
| Non RCT                                          | Ades et al. 2000                                                                                                                                                                                   |
| Trial arms involved home-based CR and usual care | Senuzun et al. 2006; Sinclair et al. 2005                                                                                                                                                          |
| Both arms received home-based CR                 | Tygesen et al. 2001                                                                                                                                                                                |
| Not home- vs. centre-based CR comparison         | Austin et al. 2005 (3 publications); Belardinelli et al. 1999 (2 publications); Dracup et al. 2007; HF-ACTION 2009 (6 publications); Jolly et al. 2009; McKelvie et al. 2002; Mutwalli et al. 2012 |
| < 6 months follow-up                             | Corvera-Tindel et al. 2004                                                                                                                                                                         |
| Relevant outcomes not reported                   | Oka et al. 2000                                                                                                                                                                                    |

CR = cardiac rehabilitation

RCT = randomised controlled trial

## Supplementary Table B: Summary of intervention details

| Study                                   | Home-based intervention                                                                                                                                                                                                                                                                                                                                                                                                                                                                                                                                                            | Centre-based intervention                                                                                                                                                                                                                                                                                                                                                                                                                                                                |
|-----------------------------------------|------------------------------------------------------------------------------------------------------------------------------------------------------------------------------------------------------------------------------------------------------------------------------------------------------------------------------------------------------------------------------------------------------------------------------------------------------------------------------------------------------------------------------------------------------------------------------------|------------------------------------------------------------------------------------------------------------------------------------------------------------------------------------------------------------------------------------------------------------------------------------------------------------------------------------------------------------------------------------------------------------------------------------------------------------------------------------------|
| <b>Arthur et al. 2002</b>               |                                                                                                                                                                                                                                                                                                                                                                                                                                                                                                                                                                                    |                                                                                                                                                                                                                                                                                                                                                                                                                                                                                          |
| Exercise                                | Total duration: 6 months, 5 sessions/week, 40 min/session. Intensity: 60-70% VO2 max. Modality: walking. Also attended one hour's exercise consultation with exercise specialist at baseline and after 3 months training, and completed exercise log that was reviewed every 2 months. Also telephone support call every 2 weeks.                                                                                                                                                                                                                                                  | Total duration: 6 months, 3 sessions/week, 40 min/session. Intensity: 60-70% VO2 max. Modality: cycle ergometer, treadmill, track walking and stair climbing. Supervised by exercise specialist and completed exercise log that was reviewed monthly.                                                                                                                                                                                                                                    |
| Other                                   | Dietary advice and psychological support                                                                                                                                                                                                                                                                                                                                                                                                                                                                                                                                           | Dietary advice and psychological support                                                                                                                                                                                                                                                                                                                                                                                                                                                 |
| <b>Bell 1998 (Heart Manual)</b>         |                                                                                                                                                                                                                                                                                                                                                                                                                                                                                                                                                                                    |                                                                                                                                                                                                                                                                                                                                                                                                                                                                                          |
| Exercise                                | Overall duration: 6 weeks. Frequency, duration and intensity not reported.                                                                                                                                                                                                                                                                                                                                                                                                                                                                                                         | Overall duration and frequency: 12 weeks of 1 session/week or 4 weeks of 2 sessions/week, ≥20 min/session. Intensity: 3-4 on Borg rating of perceived exertion (RPE) scale                                                                                                                                                                                                                                                                                                               |
| Other                                   | Four phone calls by facilitator, health education and stress management.                                                                                                                                                                                                                                                                                                                                                                                                                                                                                                           | Education sessions on causes of CHD, medication, risk factor modification, stress management and exercise.                                                                                                                                                                                                                                                                                                                                                                               |
| <b>Carlson et al. 2000</b>              |                                                                                                                                                                                                                                                                                                                                                                                                                                                                                                                                                                                    |                                                                                                                                                                                                                                                                                                                                                                                                                                                                                          |
| Exercise                                | Overall duration: 25 weeks, 2-5 sessions/week, 30-40 min/session. Intensity: 60-85% of aerobic capacity. Modality: aerobic exercise. First 4 weeks – 3 hospital-based exercise sessions/week with ECG monitoring and then progressive reduction in frequency of centre-based sessions.                                                                                                                                                                                                                                                                                             | Overall duration: 25 weeks, 2-3 sessions/week, 30-45 min/session. Intensity: 60-85% of aerobic capacity. Modality: aerobic exercise.                                                                                                                                                                                                                                                                                                                                                     |
| Other                                   | Weekly educational and counselling meetings including sessions on exercise, diet, risk factors, drugs and overcoming barriers to behaviour change. Based on Bandura's self-efficacy theory.                                                                                                                                                                                                                                                                                                                                                                                        | Three sessions of education and counselling including sessions on exercise, diet, risk factors and drugs.                                                                                                                                                                                                                                                                                                                                                                                |
| <b>Cowie et al. 2012</b>                |                                                                                                                                                                                                                                                                                                                                                                                                                                                                                                                                                                                    |                                                                                                                                                                                                                                                                                                                                                                                                                                                                                          |
| Exercise                                | One-hour aerobic-based exercise session (DVD and booklet), including 15-min warm-up and 15-min cool-down. Aerobic overload: 2 x 15-min circuits (10 simple, functional aerobic exercises e.g. knee lifts, side steps); interspersed with low-paced 'active recovery' (toe tapping or slow walking, 90 secs for each exercise). Gradual increase of the proportion of time spent on aerobic overload in relation to active recovery provided individually tailored interval training. Physiotherapist telephoned every two weeks to modify exercise prescription where appropriate. | One-hour aerobic-based exercise session (physiotherapist-led), including 15-min warm-up and 15-min cool-down. Aerobic overload: 2 x 15-min circuits (10 simple, functional aerobic exercises e.g. knee lifts, side steps); interspersed with low-paced 'active recovery' (toe tapping or slow walking, 90 secs for each exercise). Gradual increase of the proportion of time spent on aerobic overload in relation to active recovery provided individually tailored interval training. |
| Other                                   | Educated on symptoms of unstable HF. Use of heart rate monitors to guide training intensity. Encouraged to work at 12-13 on the Borg RPE. Advised to adhere to usual HF nursing care and daily routines.                                                                                                                                                                                                                                                                                                                                                                           | Educated on symptoms of unstable HF. Use of heart rate monitors to guide training intensity. Encouraged to work at 12-13 on the Borg RPE. Advised to adhere to usual HF nursing care and daily routines.                                                                                                                                                                                                                                                                                 |
| <b>Dalal et al. 2007 (Heart Manual)</b> |                                                                                                                                                                                                                                                                                                                                                                                                                                                                                                                                                                                    |                                                                                                                                                                                                                                                                                                                                                                                                                                                                                          |
| Exercise                                | Overall duration: 6 weeks. Frequency, duration and intensity not reported. Modality: walking. Home visit in first week after discharge by cardiac rehabilitation nurse followed by up to 4 telephone calls at 2, 3, 4 and 6                                                                                                                                                                                                                                                                                                                                                        | Overall duration: 8-10 weeks, 1-5 sessions/week. Duration and modality not reported. Supervised and group-based.                                                                                                                                                                                                                                                                                                                                                                         |

|                                                                                           |                                                                                                                                                                                                                                                                                                                                                                                                                                                                                                                                                                    |                                                                                                                                                                                                                                                                                                                                                                                                                                    |
|-------------------------------------------------------------------------------------------|--------------------------------------------------------------------------------------------------------------------------------------------------------------------------------------------------------------------------------------------------------------------------------------------------------------------------------------------------------------------------------------------------------------------------------------------------------------------------------------------------------------------------------------------------------------------|------------------------------------------------------------------------------------------------------------------------------------------------------------------------------------------------------------------------------------------------------------------------------------------------------------------------------------------------------------------------------------------------------------------------------------|
|                                                                                           | weeks.                                                                                                                                                                                                                                                                                                                                                                                                                                                                                                                                                             |                                                                                                                                                                                                                                                                                                                                                                                                                                    |
| Other                                                                                     | Stress management and education                                                                                                                                                                                                                                                                                                                                                                                                                                                                                                                                    | Input from dietician, psychologist, occupational therapist and pharmacist.                                                                                                                                                                                                                                                                                                                                                         |
| <b>Daskapan et al. 2005</b>                                                               |                                                                                                                                                                                                                                                                                                                                                                                                                                                                                                                                                                    |                                                                                                                                                                                                                                                                                                                                                                                                                                    |
| Exercise                                                                                  | Total duration: 12 weeks, 3 sessions/week, 45 mins/session (including warm-up, cool-down and recovery). Intensity: up to 60% peak heart rate (RPE 12-16). Modality: walking. Follow-up logs completed daily/returned biweekly. Weekly phone calls from staff monitoring adherence and progress and monthly phone calls from patients for control purposes.                                                                                                                                                                                                         | Total duration: 12 weeks, 3 sessions/week, 45 mins/session (including warm-up, cool-down and recovery). Intensity: 60% peak heart rate. Modality: walking on a treadmill (supervised)                                                                                                                                                                                                                                              |
| Other                                                                                     | Not reported                                                                                                                                                                                                                                                                                                                                                                                                                                                                                                                                                       | Not reported                                                                                                                                                                                                                                                                                                                                                                                                                       |
| <b>Gordon et al. 2002</b>                                                                 |                                                                                                                                                                                                                                                                                                                                                                                                                                                                                                                                                                    |                                                                                                                                                                                                                                                                                                                                                                                                                                    |
| Exercise                                                                                  | <p>Group 1 (supervised home-based CR): Total duration 12 weeks, frequency and intensity individually prescribed (30-60 mins aerobic exercise, 60-85% peak HR), gradually updated. Two office visits and four phone calls.</p> <p>Group 2 (community home-based CR): Total duration 12 weeks, frequency and intensity individually prescribed (30-60 mins aerobic exercise, 60-85% peak HR), gradually updated. 12 on site visits or telephone calls (patient choice)</p>                                                                                           | Total duration: 12 weeks, 3 sessions/week (total of 36 sessions). Intensity: individually prescribed (30-60 mins aerobic exercise at 60-85% peak HR). Continuous ECG telemetry during exercise.                                                                                                                                                                                                                                    |
| Other                                                                                     | Group 1 and group 2: written materials, audiotapes, nutrition, weight and stress management, smoking cessation programme, individual management of risk factors for CAD                                                                                                                                                                                                                                                                                                                                                                                            | Written materials, audiotapes, education on risk factors for coronary artery disease, and lifestyle modification                                                                                                                                                                                                                                                                                                                   |
| <b>Jolly et al. 2007 (Heart Manual and centre-based cardiac rehabilitation (control))</b> |                                                                                                                                                                                                                                                                                                                                                                                                                                                                                                                                                                    |                                                                                                                                                                                                                                                                                                                                                                                                                                    |
| Exercise                                                                                  | Overall duration: 6 weeks of Heart Manual programme and 12 weeks of nurse support. Frequency: up to daily. Duration and intensity not reported. Modality: walking.                                                                                                                                                                                                                                                                                                                                                                                                 | Total duration: 6-12 weeks, 1-2 sessions/week, 25-30 min/session. Intensity: 65-75% max HR. Modality: circuit training, cycle ergometer.                                                                                                                                                                                                                                                                                           |
| Other                                                                                     | Education on risk factors, lifestyle changes, medications and stress management (relaxation tapes)                                                                                                                                                                                                                                                                                                                                                                                                                                                                 | Education and stress management (relaxation)                                                                                                                                                                                                                                                                                                                                                                                       |
| <b>Karapolat et al. 2009</b>                                                              |                                                                                                                                                                                                                                                                                                                                                                                                                                                                                                                                                                    |                                                                                                                                                                                                                                                                                                                                                                                                                                    |
| Exercise                                                                                  | Total of 8 weeks, 3 sessions/week, 45-60 min/session. Sessions supervised by a physician at home. Specific programme designed for each patient based on individual muscle strength, joint flexibility and aerobic endurance. Included flexibility exercises (stretching of cervical and lumbar spine and upper and lower extremities), aerobic exercises (30 min treadmill, 60-70% HR reserve, 13-15 on Borg scale, including 5 min warm-up and 5 min cool-down) and breathing exercises. Training HR measured by monitor (Polar Edge, Polar Electro Oy, Finland). | Total of 8 weeks, 3 sessions/week, 45-60 min/session. Sessions supervised by a physician. Specific programme designed for each patient based on individual muscle strength, joint flexibility and aerobic endurance. Aerobic exercises performed for 30 mins on treadmill with 5 min warm-up and 5 min cool-down, 60-70% HR reserve, 13-15 on Borg scale. Training HR measured by monitor (Polar Edge, Polar Electro Oy, Finland). |
| Other                                                                                     | None                                                                                                                                                                                                                                                                                                                                                                                                                                                                                                                                                               | None                                                                                                                                                                                                                                                                                                                                                                                                                               |

| <b>Kassaian et al. 2000</b>   |                                                                                                                                                                                                                                                                                                                                                               |                                                                                                                                                                                                                                                                                                                                        |
|-------------------------------|---------------------------------------------------------------------------------------------------------------------------------------------------------------------------------------------------------------------------------------------------------------------------------------------------------------------------------------------------------------|----------------------------------------------------------------------------------------------------------------------------------------------------------------------------------------------------------------------------------------------------------------------------------------------------------------------------------------|
| Exercise                      | Total duration: 12 weeks. Frequency and duration not reported. Intensity 'based on exercise test results'.                                                                                                                                                                                                                                                    | Total duration: 12 weeks, 3 sessions/week, 20-30 min/session plus 10 min warm-up and 10 min cool-down. Intensity: 60-85% (not reported if relative to HR max. or VO2 max.)                                                                                                                                                             |
| Other                         | Patients taught to count their pulse rate                                                                                                                                                                                                                                                                                                                     | Not reported                                                                                                                                                                                                                                                                                                                           |
| <b>Marchionni et al. 2003</b> |                                                                                                                                                                                                                                                                                                                                                               |                                                                                                                                                                                                                                                                                                                                        |
| Exercise                      | Overall duration: 8 weeks, 3 days/week, 1 hour/session. Intensity: 70-85% peak HR. Modality: cycle ergometer. Physical therapist home visits every other week.                                                                                                                                                                                                | Overall duration: 12 weeks, 3 days/week, duration not reported. Intensity: 70-85% peak HR. Modality: cycle ergometer. Trans-telephonic ECG monitoring during exercise.                                                                                                                                                                 |
| Other                         | Monthly family-oriented support groups                                                                                                                                                                                                                                                                                                                        | Risk factor management counselling; support group meetings                                                                                                                                                                                                                                                                             |
| <b>Miller et al. 1984</b>     |                                                                                                                                                                                                                                                                                                                                                               |                                                                                                                                                                                                                                                                                                                                        |
| Exercise                      | Overall duration: 8 weeks (brief) or 23 weeks (extended). 5 sessions/week, 30 mins/session. Intensity: 70-85% HR max. Modality: cycle ergometer. Portable HR monitors and trans-telephonic ECG. Two phone calls/week by staff to verify training intensity, clinical status and medication.                                                                   | Overall duration: 8 weeks (brief) or 23 weeks (extended). 5 sessions/week, 60 mins/session. Intensity: 70-85% HR max. Modality: walking/jogging. Group-based and supervised.                                                                                                                                                           |
| Other                         | No education or psychological intervention reported                                                                                                                                                                                                                                                                                                           | No education or psychological intervention reported                                                                                                                                                                                                                                                                                    |
| <b>Moholdt et al. 2012</b>    |                                                                                                                                                                                                                                                                                                                                                               |                                                                                                                                                                                                                                                                                                                                        |
| Exercise                      | Total duration: 6 months, 3 sessions/week, 38 min/session (10 min warm-up, 4x4 min intervals of high intensity exercise (HR 85-95%), 4x3 min intervals of moderate intensity (HR approx. 70%). Modality: walking, jogging, swimming or cycling (chosen by patient)                                                                                            | Total duration: 4 weeks, 30 exercise sessions – 4 low intensity (up to 11 on Borg scale), 16 moderate intensity (12-14 on Borg scale), and 10 high intensity (15-17 on Borg scale). Modality: outdoor walking, cross-country skiing, indoor cycling, hall games, and strength training.                                                |
| Other                         | Diet counselling, smoking cessation programme, lectures about healthy lifestyle. After discharge from the rehabilitation centre, patients were advised to keep exercising at home, and invited back for follow-up testing after 6 months.                                                                                                                     | Diet counselling, smoking cessation programme, lectures about healthy lifestyle. After discharge from the rehabilitation centre, patients were advised to keep exercising at home, and invited back for follow-up testing after 6 months. They did not receive a training diary or concrete advice about how to exercise on discharge. |
| <b>Oerkild et al. 2011</b>    |                                                                                                                                                                                                                                                                                                                                                               |                                                                                                                                                                                                                                                                                                                                        |
| Exercise                      | Total duration: 6 weeks, 6 days/week, 30 min/session. Intensity: 11-13 on Borg scale modality: self-passed brisk walking and stationary cycling. Exercise programmes individually tailored by a physiotherapist. At end of intervention at 3 months, participants were encouraged to continue to exercise for 30 mins 6 days/week at 11-13 on the Borg scale. | Total duration: 6 weeks, 2 sessions/week, 60 min/session, high intensity. At end of intervention at 3 months, participants were encouraged to continue to exercise for 30 mins 6 days/week at 11-13 on the Borg scale.                                                                                                                 |
| Other                         | Patients offered six education lectures, two dietary counselling sessions, three practical cooking and (if needed) smoking cessation counselling sessions. Cardiologist counselling on risk factors and medical adjustment at baseline, 3, 6 and 12 months. Telephone call at 4 and 5 months.                                                                 | Offered dietary counselling and (if needed) smoking cessation. Cardiologist counselling on risk factors and medical adjustment at baseline, 3, 6 and 12 months. Telephone call at 4 and 5 months.                                                                                                                                      |
| <b>Piotrowicz et al. 2010</b> |                                                                                                                                                                                                                                                                                                                                                               |                                                                                                                                                                                                                                                                                                                                        |

|                           |                                                                                                                                                                                                                                                                                                                    |                                                                                                                                                                                                                                                        |
|---------------------------|--------------------------------------------------------------------------------------------------------------------------------------------------------------------------------------------------------------------------------------------------------------------------------------------------------------------|--------------------------------------------------------------------------------------------------------------------------------------------------------------------------------------------------------------------------------------------------------|
| Exercise                  | Overall duration: 8 weeks, 3 sessions/week, 20-45 min/session. Including i) 5-10 min warm-up (breathing and light exercises, calisthenics), ii) 10-30 min basic aerobic endurance training (walking) and iii) 5 min cool-down. Given heart rate recording device and mobile phone to monitor and control training. | As home-based, except supervised interval cycling exercise.                                                                                                                                                                                            |
| Other                     | Education programme for patients and partners: how to measure HR, BP and body weight; evaluate signs and symptoms; level perceived exertion and how to perform exercise training. Each patient received psychological support.                                                                                     | As home-based group.                                                                                                                                                                                                                                   |
| <b>Sparks et al. 1993</b> |                                                                                                                                                                                                                                                                                                                    |                                                                                                                                                                                                                                                        |
| Exercise                  | Overall duration: 12 weeks, 3 days/week, 1 hour/session. Intensity: 60-75% peak HR. Modality: cycle ergometer. Trans-telephonic ECG monitoring.                                                                                                                                                                    | As home-based, but no trans-telephonic ECG monitoring during exercise.                                                                                                                                                                                 |
| Other                     | Education materials on diet, medications, risk and benefits of exercise                                                                                                                                                                                                                                            | Education materials on diet, medications, risk and benefits of exercise                                                                                                                                                                                |
| <b>Wu et al. 2006</b>     |                                                                                                                                                                                                                                                                                                                    |                                                                                                                                                                                                                                                        |
| Exercise                  | Total duration: 12 weeks, 3 or more sessions/week, 30-60 mins plus 10 min warm-up and 10 min cool-down/session. Intensity: 60-85% HR max. Modality: fast walking or jogging. Exercise documented in record book. Prescription of exercise individually given and updated every two weeks by rehabilitation nurse.  | Total duration: 12 weeks, 3 sessions/week (total 36 sessions), 30-60 mins plus 10 min warm-up and 10 min cool-down/session. Intensity: 60-85% HR max. Modality: cycle ergometer, treadmill. Exercise supervised by cardiopulmonary physical therapist. |
| Other                     | Not reported                                                                                                                                                                                                                                                                                                       | Not reported                                                                                                                                                                                                                                           |

**Supplementary Table C: Summary of adherence at follow-up in home-based compared with centre-based rehabilitation, including method for or definition of assessment of adherence**

| <b>Trial</b>                                                             | <b>Follow-up</b>          | <b>Method/definition of adherence assessment</b>                                                                                                       | <b>Findings</b>                                                                                                                              | <b>Between-group difference</b> |
|--------------------------------------------------------------------------|---------------------------|--------------------------------------------------------------------------------------------------------------------------------------------------------|----------------------------------------------------------------------------------------------------------------------------------------------|---------------------------------|
| Author (year)                                                            |                           |                                                                                                                                                        |                                                                                                                                              |                                 |
| <b>Miller et al. (1984) / DeBusket al. (1985) / Taylor et al. (1986)</b> | 6 months                  | Ratio of exercise sessions completed vs. prescribed                                                                                                    | Home: 50/70 (72%)<br>Centre: 28/40 (71%)<br><br>P-value not calculable                                                                       | Home = Centre**                 |
| <b>Sparks et al. (1993)</b>                                              | 3 months                  | Percentage of sessions attended                                                                                                                        | Home: 93%<br>Centre: 88%<br><br>P-value not calculable                                                                                       | ?                               |
| <b>Cowie et al. (2012)</b>                                               | 3 months                  | Percentage completion of 16 exercise sessions                                                                                                          | Home: 77%<br>Centre: 86%<br><br>P = 0.32                                                                                                     | Home = Centre                   |
| <b>Karapolat et al. (2009)</b>                                           | 8 weeks                   | Attendance at exercise sessions                                                                                                                        | Home: (32/37) 87.5%<br>Centre: (33/37) 90%<br><br>P = 0.72*                                                                                  | Home = Centre                   |
| <b>Carlson et al. (2000)</b>                                             | 6 months                  | Attendance at all 3 nutrition/risk factor classes<br><br>Total exercise over follow up – number of sessions ≥ 30 min                                   | Home: 27/38 (71%)<br>Centre: 33/42 (79%)<br><br>P = 0.438*<br><br>Home: mean 111.8 (SD 29.1)<br>Centre: mean 98.1 (SD 33.4)<br><br>P = 0.06† | Home = Centre                   |
| <b>Gordon et al. (2002)</b>                                              | 3 months                  | Percentage of completed scheduled appointments (exercise sessions, office/on site visits, “telephone visits” in accordance with intervention protocol) | Home (MD supervised): 83%<br>Home (community-based): 86%<br>Centre: 81%                                                                      | Home = Centre**                 |
| <b>Arthur et al. (2002) / Smith et al. (2004)</b>                        | 6 months<br><br>18 months | Number of exercise session reported/week<br><br>Percentage of patients seeking dietician                                                               | Home: mean 6.5 (SD 4.6)<br>Centre: mean 3.7 (SD 2.6)<br><br>P < 0.0001†<br>Home 50% (mean 3.5,                                               | Home > Centre<br><br><br><br>?  |

|                                 |           |                                                                      |                                       |                 |
|---------------------------------|-----------|----------------------------------------------------------------------|---------------------------------------|-----------------|
|                                 |           | consultation                                                         | SD 2.5 visits)                        |                 |
|                                 |           |                                                                      | Centre: 53% (mean 3.6, SD 2.3 visits) |                 |
|                                 |           | Percentage of patients seeking psychologist consultation             | Home: 42% (mean 2.6, SD 2.4 visits)   | Home = Centre** |
|                                 |           |                                                                      | Centre: 51% (mean 2.5, SD 2.2 visits) |                 |
|                                 |           | Level of physical activity – Physical Activity Scale for the Elderly | Home: mean 232.6 (SD 99.4)            | Home > Centre   |
|                                 |           |                                                                      | Centre: mean 170.0 (SD 89.2)          |                 |
|                                 |           |                                                                      | P < 0.0001†                           |                 |
| <b>Marchionni et al. (2003)</b> | 4 months  | Number of exercise sessions completed                                | Home: 37.3 (SD 3.4)                   | Home > Centre   |
|                                 |           |                                                                      | Centre: 34.3 (SD 4.4)                 |                 |
|                                 |           |                                                                      | P < 0.0001†                           |                 |
| <b>Daskapan et al. (2005)</b>   | 3 months  | Percentage of sessions attended                                      | Home: 97%                             | ?               |
|                                 |           |                                                                      | Centre: 81%                           |                 |
|                                 |           |                                                                      | P-value not calculable                |                 |
| <b>Dalal et al. (2007)</b>      | 9 months  | Number who participated in intervention                              | Home: 40/60 (67%)                     | Home = Centre   |
|                                 |           |                                                                      | Centre: 32/44 (72%)                   |                 |
|                                 |           |                                                                      | P = 0.51*                             |                 |
| <b>Jolly et al. (2007)</b>      | 3 months  | Hours of self-reported activity weighted for intensity               | Home: mean 23.2 (SD 22.1)             | Home = Centre   |
|                                 |           |                                                                      | Centre: mean 18.7 (SD 19.3)           |                 |
|                                 | 6 months  |                                                                      | P = 0.06†                             | Home = Centre   |
|                                 |           |                                                                      | Home: mean 16.4 (SD 17.0)             |                 |
|                                 |           |                                                                      | Centre: mean 18.1 (SD 25.4)           |                 |
|                                 | 12 months |                                                                      | P = 0.4†                              | Home = Centre   |
|                                 |           |                                                                      | Home: mean 19.2 (SD 20.8)             |                 |
|                                 | 24 months |                                                                      | Centre: mean 15.9 (SD 16.7)           | Home = Centre   |
|                                 |           |                                                                      | P = 0.06†                             |                 |
|                                 |           |                                                                      | Home: mean 18.9 (SD 18.4)             |                 |
|                                 |           |                                                                      | Centre: mean 16.6 (SD                 |                 |

|                          |          |                                                                                                                                                                                         |                                                                                                                   | 16.4)         |
|--------------------------|----------|-----------------------------------------------------------------------------------------------------------------------------------------------------------------------------------------|-------------------------------------------------------------------------------------------------------------------|---------------|
|                          |          |                                                                                                                                                                                         |                                                                                                                   | P = 0.16†     |
| <b>Moholdt (2012)</b>    | 6 months | Training diaries (only reported for home group)                                                                                                                                         | Home: 7/10 patients (with complete diary data) reported $\geq 2$ weekly interval sessions over 6 months follow up | ?             |
| <b>Piotrowicz (2010)</b> | 8 weeks  | Percentage of patients who carried out the prescribed exercise training (home group: daily telephone contacts with monitoring centre; centre group: attendance at supervised sessions). | Home: 77/77 (100%)<br>Centre: 59/75 (79%)<br>P < 0.0001†                                                          | Home > Centre |

\*calculated by authors of this report based on Chi<sup>2</sup> test †calculated by authors of this report based on independent t-test  
Home = Centre: no statistically significant difference (P > 0.05) in health-related quality of life (HRQoL) between home- and centre-based groups at follow up  
Home > Centre: statistically significant (P  $\leq$  0.05) higher HRQoL in home- versus centre-based groups at follow up  
Home < Centre: statistically significant (P  $\leq$  0.05) lower HRQoL in home- versus centre-based groups at follow up  
\*\*Home- and centre-based groups at follow up appear to be similar but P-value not reported or calculable  
?Home- and centre-based groups at follow up appear different but P-value not reported or calculable



## Supplementary Figures

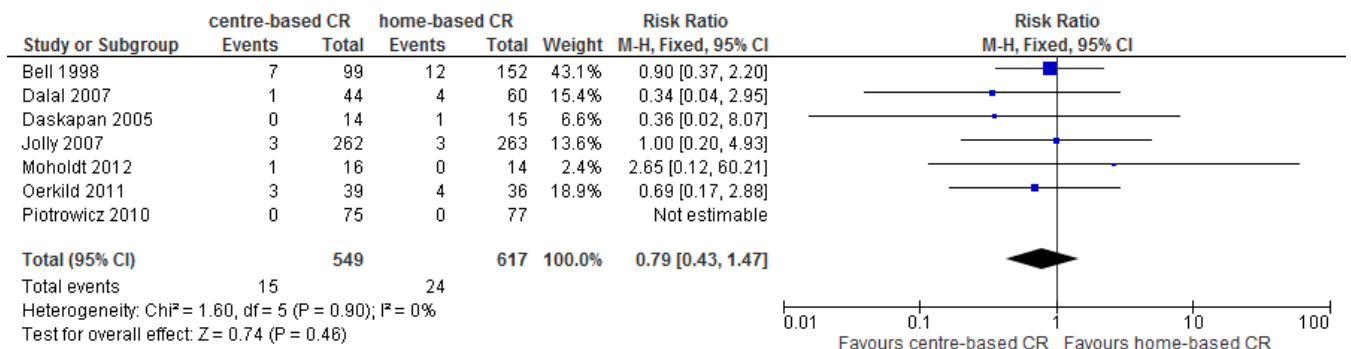

Supplementary Figure A: Mortality

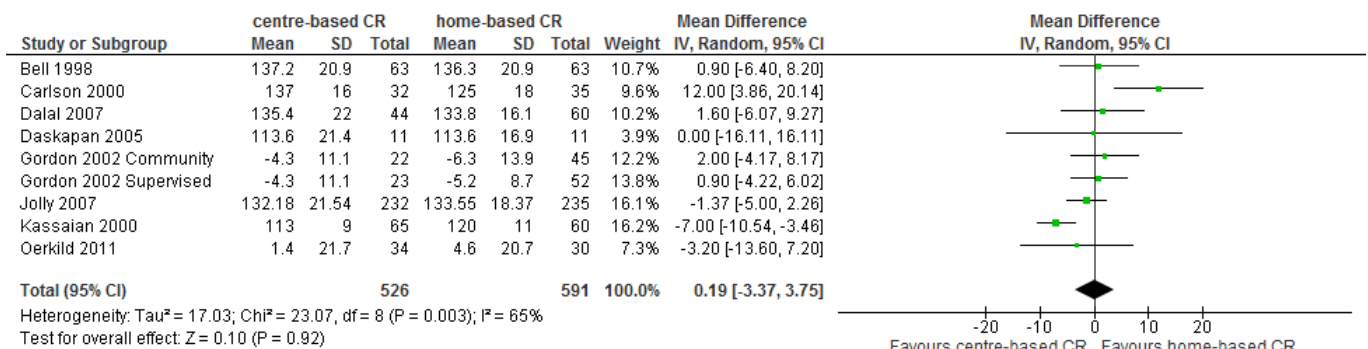

Supplementary Figure B: Blood pressure (mmHg): systolic BP 3 to 12 months

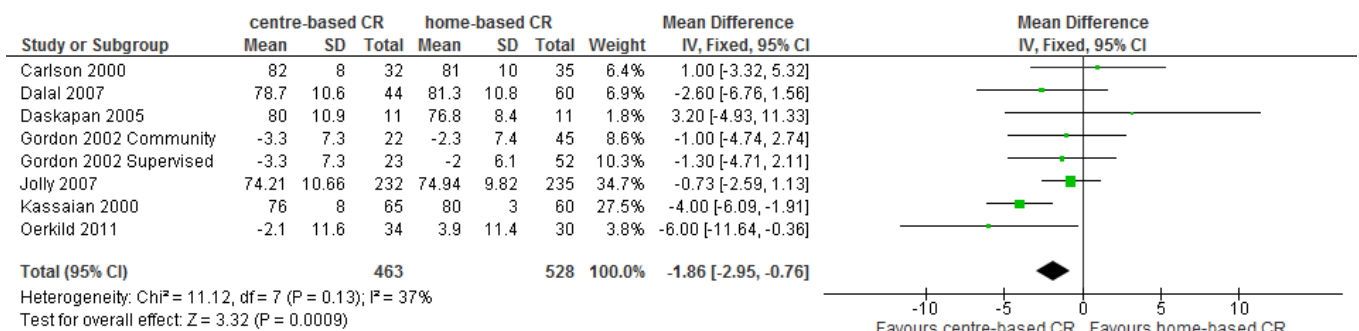

Supplementary Figure C: Blood pressure (mmHg): diastolic BP 3 to 12 months

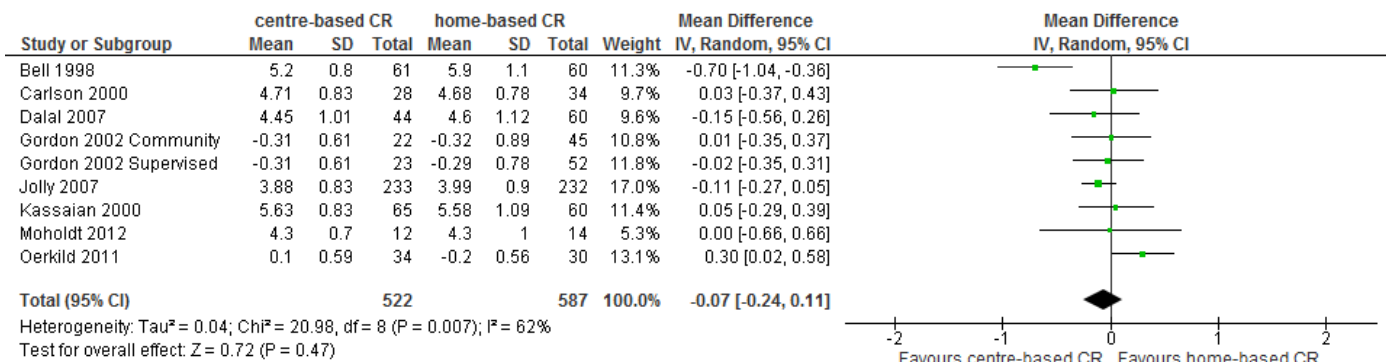

**Supplementary Figure D: Blood lipids mmol/l: Total cholesterol 3 to 12 months**

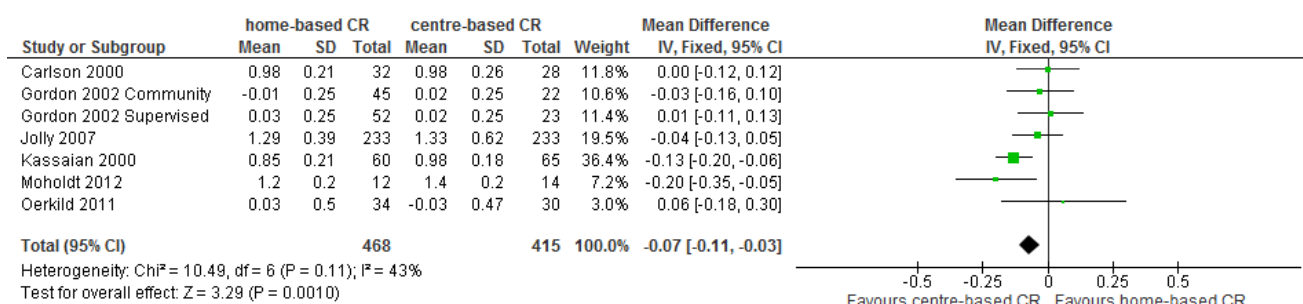

**Supplementary Figure E: Blood lipids mmol/l: HDL cholesterol 3 to 12 months**

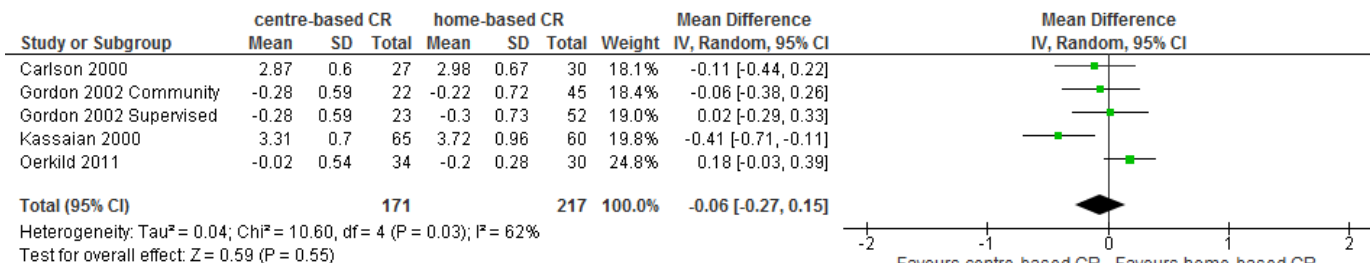

**Supplementary Figure F: Blood lipids mmol/l: LDL cholesterol 3 to 12 months**

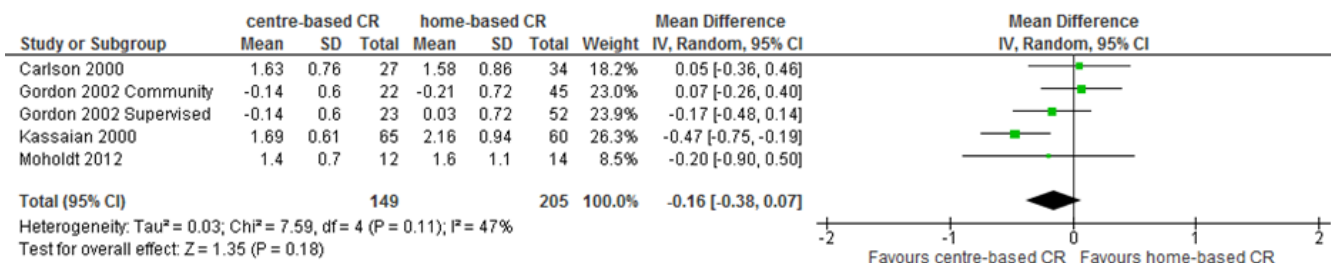

**Supplementary Figure G: Blood lipids mmol/l: triglycerides 3 to 12 months**

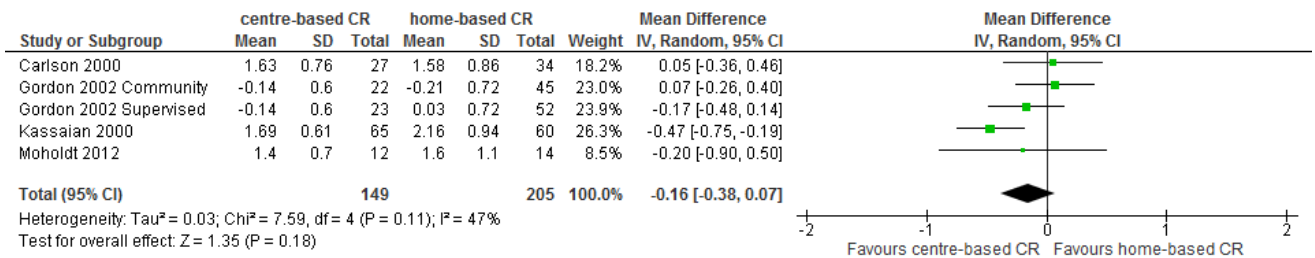

**Supplementary Figure H: Smoking 3 to 12 months**

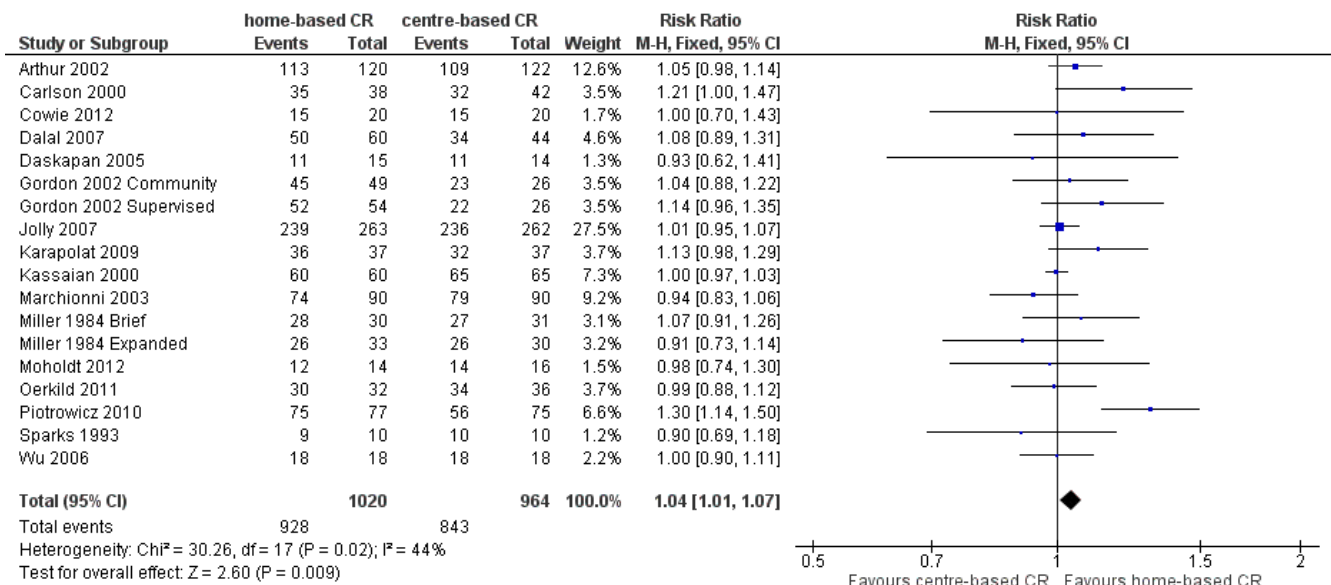

**Supplementary Figure I: Number of participants with outcome data at follow-up (completers)**



## Example of search strategy (MEDLINE OVID database)

### MEDLINE OVID

1. exp Myocardial Ischemia/
2. (myocard\* adj3 isch?mi\*).tw.
3. (isch?mi\* adj3 heart).tw.
4. exp Coronary Artery Bypass/
5. coronary.tw.
6. exp Coronary Disease/
7. exp Myocardial Revascularization/
8. exp Myocardial Infarction/
9. (myocard\* adj3 infarct\*).tw.
10. (heart adj3 infarct\*).tw.
11. exp Angina Pectoris/
12. angina.tw.
13. exp Heart Failure/
14. (heart adj3 (failure or attack)).tw.
15. exp Heart Diseases/
16. (heart adj3 disease\*).tw.
17. myocard\*.tw.
18. cardiac\*.tw.
19. CABG.tw.
20. PTCA.tw.
21. (stent\* adj3 (heart or cardiac\*)).tw.
22. Heart Bypass, Left/
23. exp Heart Bypass, Right/
24. or/1-23
25. Rehabilitation Centers/
26. exp Exercise Therapy/
27. Sports/
28. Physical Exertion/
29. rehabilitat\*.tw.
30. (physical\* adj3 (fit\* or train\* or therap\* or activit\*)).tw.
31. exp Exercise/
32. (train\* adj3 (strength\* or aerobic or exercise\*)).tw.
33. ((exercise\* or fitness) adj3 (treatment or intervent\* or program\*)).tw.
34. exp Rehabilitation/
35. Patient Education as Topic/
36. (patient\* adj3 educat\*).tw.
37. ((lifestyle or life-style) adj3 (intervent\* or program\* or treatment\*)).tw.
38. exp Self Care/
39. exp Ambulatory Care/
40. exp Psychotherapy/
41. psychotherap\*.tw.
42. (psycholog\* adj3 intervent\*).tw.
43. relax\*.tw.
44. Relaxation Therapy/
45. exp Counseling/
46. counsel?ing.tw.

47. exp Cognitive Therapy/
48. exp Behavior Therapy/
49. (behavio?r\* adj4 (modif\* or therap\* or rehab\* or change)).tw.
50. exp Stress, Psychological/
51. (stress adj3 manage\*).tw.
52. (cognitive\* adj3 therap\*).tw.
53. exp Meditation/
54. meditat\*.tw.
55. Anxiety/
56. (manage\* adj3 (anxiety or depres\*)).tw.
57. CBT.tw.
58. hypnotherap\*.tw.
59. (goal adj3 setting).tw.
60. (psycho-educat\* or psychoeducat\*).tw.
61. (motivat\* adj3 interv\*).tw.
62. exp Psychopathology/
63. psychopathol\*.tw.
64. exp Autogenic Training/
65. autogenic\*.tw.
66. (self adj3 (manage\* or care or motivat\*)).tw.
67. distress\*.tw.
68. (psychosocial\* or psycho-social\*).tw.
69. exp Health Education/
70. ((nutrition or diet or health) adj3 education).tw.
71. heart manual.tw.
72. home based.tw.
73. or/25-72
74. randomized controlled trial.pt.
75. controlled clinical trial.pt.
76. randomized.ab.
77. placebo.ab.
78. drug therapy.fs.
79. randomly.ab.
80. trial.ab.
81. groups.ab.
82. 74 or 75 or 76 or 77 or 78 or 79 or 80 or 81
83. exp animals/ not humans.sh.
84. 82 not 83
85. 24 and 73 and 8
86. (2008\* or 2009\* or 2010\* or 2011\* or 2012\* or 2013\* or 2014\*).ed.
87. 85 and 86

## References for excluded studies

- Ades, P.A., Pashkow, F.J., Fletcher, G., *et al.* A controlled trial of cardiac rehabilitation in the home setting using electrocardiographic and voice transtelephonic monitoring. *Am Heart J.* 2000;139:543-8.
- Austin, J., Williams, R., Ross, L., *et al.* Randomised controlled trial of cardiac rehabilitation in elderly patients with heart failure. *Eur J Heart Fail.* 2005;7(3):411-7.
- Belardinelli, R., Georgiou, D., Cianci, G., *et al.* Randomized, controlled trial of long-term moderate exercise training in chronic heart failure: effects on functional capacity, quality of life, and clinical outcome. *Circulation* 1999;99(9):1173-82.
- Corvera-Tindel, T., Doering, L.V., Woo, M.A., *et al.* Effects of a home walking exercise program on functional status and symptoms in heart failure. *Am Heart J.* 2004;147(2):339-46.
- Dracup, K., Evangelista, L.S., Hamilton, M.A., Erickson, V., Hage, A., Moriguchi, J., *et al.* Effects of a home-based exercise program on clinical outcomes in heart failure. *Am Heart J.* 2007;154(5):877-83.
- HF ACTION 2009: Whellan, D.J., O'Connor, C.M., Lee, K.L., *et al.* Heart failure and a controlled trial investigating outcomes of exercise training (HF-ACTION): design and rationale. *Am Heart J.* 2007;153:201-11.
- Jolly, K., Taylor, R.S., Lip, G.Y., *et al.* A randomized trial of the addition of home-based exercise to specialist heart failure nurse care: the Birmingham Rehabilitation Uptake Maximisation study for patients with Congestive Heart Failure (BRUM-CHF) study. *Eur J Heart Fail: journal of the Working Group on Heart Failure of the European Society of Cardiology*, 2009;11:205-13.
- McKelvie, R.S., Teo, K.K., Roberts, R., *et al.* Effects of exercise training in patients with heart failure: the Exercise Rehabilitation Trial (EXERT). *Am Heart J.* 2002;144(1):23-30.
- Mutwalli, H.A., Fallows, S.J., Arnous, A.A., *et al.* Randomized controlled evaluation shows the effectiveness of a home-based cardiac rehabilitation program. *Saudi Medical Journal* 2012;33:152-9.
- Oka, R.K., De Marco, T., Haskell, W.L., *et al.* Impact of a home-based walking and resistance training program on quality of life in patients with heart failure. *Am J Cardiol.* 2000;85(3):365-9.
- Senuzun, F., Fadiloglu, C., Burke, L., *et al.* Effects of home-based cardiac exercise program on the exercise tolerance, serum lipid values and self-efficacy of coronary patients. *Eur J Cardiovasc Prev Rehabil.* 2006;13(4):640-5.
- Sinclair, A., Conroy, S., Davies, M., *et al.* Post-discharge home-based support for older cardiac patients: a randomised controlled trial. *Age and Ageing* 2005;34(4):338-43.

Tygesen, H., Wettervik, C. & Wennerblom, B. Intensive home-based exercise training in cardiac rehabilitation increases exercise capacity and heart rate variability. *Int J Cardiol.* 2001;79(2-3):175-82.
